# Supplementary material
Source: publisher site journal article supplement (https://www.dovepress.com/article/supplementary_file/612297/612297%20Revised%20supplementary%20Table%20S1.docx)
Supplement: Supplementary file 1 [file 612297%20Revised%20supplementary%20Table%20S1.docx]

**Supplementary Table S1.** OperationalDefinitions of the S-HTP Drawing Characteristics

| **Code** | **Characteristic** | **Operational** Definition |
| --- | --- | --- |
| A1 | Multiple subjects | Presence of two or more major drawing themes or focal subjects within the same drawing. |
| A2 | Incomplete line junctions | Failure of connecting lines to meet properly, resulting in visible gaps at corners, intersections, or enclosed shapes. |
| A3 | Tracing in shaky lines | Difficulty producing straight lines, characterized by repeated tracing, unstable stroke direction, or visibly uneven line trajectories. |
| A4 | Lines jagged and not joined | Poor line continuity characterized by broken, fragmented, or discontinuous strokes. |
| A5 | Strong strength drawing | Excessively heavy line pressure resulting in unusually dark, forceful, or deeply impressed strokes. |
| A6 | Coloring beyond the edges | Coloring extends beyond the intended boundaries of an object or figure. |
| A7 | Brushwork in chaos | Disorganized coloring characterized by inconsistent, multidirectional, or poorly controlled stroke patterns. |
| A8 | More than 7 different colors | Use of more than seven distinct colors within a drawing, excluding rainbow-related content. |
| A9 | Revised strokes | Visible modification marks within the drawing, such as crossed-out lines, overwritten strokes, or corrections made to previously drawn elements. |
| A10 | Omission of essential elements | Absence of key structural components required for the depicted object (e.g., missing parts of a house, tree, or person). |
| B1 | Large house | House occupying more than two-thirds of the available page area. |
| B2 | Three houses or more | Presence of three or more houses within the drawing. |
| B3 | Misaligned windows | Presence of multiple windows that are noticeably misaligned, unevenly positioned, or difficult to align symmetrically. |
| C1 | Large tree | Tree occupying more than two-thirds of the available page area. |
| D1 | Three persons or more | Presence of three or more human figures within the drawing. |
| D2 | Person actively moving | Human figure depicted or described as engaging in movement, action, or physical activity based on the drawing and post-drawing interview. |
| D3 | Person at odds | Human figure described during the post-drawing interview as being involved in conflict, argument, rejection, anger, unhappiness, interpersonal difficulties, or other negative social interactions. |
| D4 | Messy hair* | Hair drawn in a noticeably disorganized, tangled, or chaotic manner. |
| E1 | Three animals or more | Presence of three or more animals within the drawing. |
| E2 | Traffic scene | Presence of roads, vehicles, traffic signs, or other transportation-related elements forming a traffic-related context. |
| E3 | Weapon | Presence of weapons such as guns, knives, swords, or other objects intended for attack or defense. |

*The characteristic “Messy hair” demonstrated poor inter-rater agreement (κ = 0.348).
